# Supplementary material for: Multiple Tick-Borne Pathogens in Ixodes ricinus Ticks Collected from Humans in Romania
Source: PubMed Central journal article supplement (PMC7281082; doi:10.3390/pathogens9050390), 2020-05-19
Supplement: pathogens-09-00390-s001.pdf [file pathogens-09-00390-s001.pdf]

Supplementary Material

**Table S1.** The overall prevalence of tick-borne pathogens in *I. ricinus* ticks collected from humans.

| Pathogen                  | Prevalence % (+/n; 95% CI)      |                                     |                                   |                                     |
|---------------------------|---------------------------------|-------------------------------------|-----------------------------------|-------------------------------------|
|                           | Larvae                          | Nymphs                              | Female                            | Total                               |
| <i>A. phagocytophilum</i> | 4.76 (1/21; 0.12–23.82)         | 5.04 (21/417; 3.22–7.7)             | 8.33 (7/84; 3.42–16.42)           | 5.56 (29/522; 3.90–7.86)            |
| <i>B. microti</i>         | 0 (0/21)                        | 2.40 (10/417; 1.31–4.36)            | 1.19 (1/84; 0.03–6.46)            | 2.11 (11/522; 1.18–3.73)            |
| <i>B. venatorum</i>       | 0 (0/21)                        | 0.96 (4/417; 0.37–2.44)             | 0 (0/84)                          | 0.77 (4/522; 0.30–1.95)             |
| <i>B. afzelii</i>         | 4.76 (1/21; 0.12–23.82)         | 5.28 (22/417; 3.51–7.86)            | 7.14 (6/84; 2.67–14.90)           | 5.56 (29/522; 3.90–7.86)            |
| <i>B. garinii</i>         | 0 (0/21)                        | 2.88 (12/417; 1.65–4.96)            | 3.57 (3/84; 0.74–10.08)           | 2.87 (15/522; 1.75–4.69)            |
| <i>B. lusitaniae</i>      | 0 (0/21)                        | 2.40 (10/417; 1.31–4.36)            | 3.57 (3/84; 0.74–10.08)           | 2.49 (13/522; 1.46–4.21)            |
| <i>B. miyamotoi</i>       | 4.76 (1/21; 0.12–23.82)         | 1.20 (5/417; 0.51–2.78)             | 2.38 (2/84; 0.29–8.34)            | 1.53 (8/522; 0.78–2.99)             |
| <i>B. valaisiana</i>      | 0 (0/21)                        | 1.68 (7/417; 0.82–3.42)             | 2.38 (2/84; 0.29–8.34)            | 1.72 (9/522; 0.91–3.24)             |
| <i>N. mikurensis</i>      | 0 (0/21)                        | 6.71 (28/417; 4.69–9.53)            | 3.57 (3/84; 0.74–10.08)           | 5.94 (31/522; 4.21–8.31)            |
| <i>R. helvetica</i>       | 0 (0/21)                        | 4.56 (19/417; 2.8–7.15)             | 7.14 (6/84; 2.67–14.9)            | 4.79 (25/522; 3.2–7.1)              |
| <i>R. monacensis</i>      | 0 (0/21)                        | 1.68 (7/417; 0.74–3.58)             | 1.19 (1/84; 0.03–6.46)            | 1.53 (8/522; 0.78–2.99)             |
| <b>TOTAL</b>              | <b>14.29 (3/21; 3.05–36.34)</b> | <b>30.46 (127/417; 26.23–35.03)</b> | <b>34.52 (29/84; 24.48–45.69)</b> | <b>30.46 (159/522; 26.67–34.54)</b> |

–: not collected; +/n: number of positive samples/total number of samples.

**Table S2.** Co-infections with different tick-borne pathogens in *I. ricinus* ticks collected from humans in Romania.

| Pathogens                                                         | Prevalence % (+/n; 95% CI)     |                                 |                                  | Total                             |
|-------------------------------------------------------------------|--------------------------------|---------------------------------|----------------------------------|-----------------------------------|
|                                                                   | 2013                           | 2014                            | 2015                             |                                   |
| <i>A. phagocytophilum</i> + <i>R. helvetica</i>                   | -                              | 3.51 (2/57; 0.43–12.11)         | 1.54 (1/65; 0.04–8.28)           | 1.89 (3/159; 0.39–5.41)           |
| <i>A. phagocytophilum</i> + <i>R. monacensis</i>                  | -                              | -                               | 1.54 (1/65; 0.04–8.28)           | 0.63 (1/159; 0.02–3.45)           |
| <i>A. phagocytophilum</i> + <i>B. afzelii</i>                     | -                              | 1.75 (1/57; 0.04–9.39)          | -                                | 0.63 (1/159; 0.02–3.45)           |
| <i>A. phagocytophilum</i> + <i>B. garinii</i>                     | 2.7 (1/37; 0.07–14.16)         | -                               | -                                | 0.63 (1/159; 0.02–3.45)           |
| <i>A. phagocytophilum</i> + <i>B. microti</i>                     | -                              | -                               | 1.54 (1/65; 0.04–8.28)           | 0.63 (1/159; 0.02–3.45)           |
| <i>B. afzelii</i> + <i>B. microti</i>                             | 2.7 (1/37; 0.07–14.16)         | -                               | -                                | 0.63 (1/159; 0.02–3.45)           |
| <i>B. afzelii</i> + <i>N. mikurensis</i>                          | -                              | -                               | 1.54 (1/65; 0.04–8.28)           | 0.63 (1/159; 0.02–3.45)           |
| <i>B. afzelii</i> + <i>R. helvetica</i>                           | -                              | -                               | 1.54 (1/65; 0.04–8.28)           | 0.63 (1/159; 0.02–3.45)           |
| <i>B. garinii</i> + <i>N. mikurensis</i>                          | -                              | 3.51 (2/57; 0.43–12.11)         | -                                | 1.26 (2/159; 0.15–4.47)           |
| <i>B. garinii</i> + <i>R. monacensis</i>                          | -                              | 1.75 (1/57; 0.04–9.39)          | -                                | 0.63 (1/159; 0.02–3.45)           |
| <i>B. lusitaniae</i> + <i>N. mikurensis</i>                       | -                              | 1.75 (1/57; 0.04–9.39)          | -                                | 0.63 (1/159; 0.02–3.45)           |
| <i>B. valaisiana</i> + <i>B. venatorum</i> + <i>N. mikurensis</i> | -                              | -                               | 1.54 (1/65; 0.04–8.28)           | 0.63 (1/159; 0.02–3.45)           |
| <i>B. valaisiana</i> + <i>N. mikurensis</i>                       | -                              | -                               | 1.54 (1/65; 0.04–8.28)           | 0.63 (1/159; 0.02–3.45)           |
| <i>N. mikurensis</i> + <i>B. microti</i>                          | -                              | -                               | 1.54 (1/65; 0.04–8.28)           | 0.63 (1/159; 0.02–3.45)           |
| <i>N. mikurensis</i> + <i>B. venatorum</i>                        | -                              | 1.75 (1/57; 0.04–9.39)          | -                                | 0.63 (1/159; 0.02–3.45)           |
| <i>R. helvetica</i> + <i>B. microti</i>                           | -                              | 1.75 (1/57; 0.04–9.39)          | -                                | 0.63 (1/159; 0.02–3.45)           |
| <i>R. helvetica</i> + <i>B. venatorum</i>                         | -                              | -                               | 1.54 (1/65; 0.04–8.28)           | 0.63 (1/159; 0.02–3.45)           |
| <i>R. helvetica</i> + <i>N. mikurensis</i>                        | -                              | -                               | 4.62 (3/65; 0.96–12.9)           | 1.89 (3/159; 0.39–5.41)           |
| <b>TOTAL</b>                                                      | <b>5.41 (2/37; 0.66–18.19)</b> | <b>15.79 (9/57; 7.48–27.87)</b> | <b>18.46 (12/65; 9.92–30.03)</b> | <b>14.47 (23/159; 9.40–20.91)</b> |

–: not detected; +/n: number of co-infected samples/total number of positive samples with at least one pathogen.
